# Supplementary material for: Alternating aeration strategy to reduce aeration energy demand for aerobic granular sludge and analysis of microbial community dynamics
Source: Royal Society of Chemistry journal article supplement (doi:10.1039/d2ew00100d), 2022-01-01
Supplement: d2ew00100d1.pdf [file d2ew00100d1.pdf]

# Supplementary information

For

**Alternating aeration strategy to reduce aeration energy demand for aerobic granular sludge and analysis of microbial community dynamics**

Biao Wang<sup>a</sup>, Shaogen Liu<sup>a\*</sup>, Xin Yao<sup>a</sup>, Yang Liu<sup>a</sup>, Gongqi Qi<sup>a</sup>

a. School of Environment and Energy Engineering, Anhui Jianzhu University, Hefei  
230022, China

\*Corresponding author.

E-mail address: liushgen@mail.ustc.edu.cn (Shao-Gen Liu).

Tel/fax: +86-551-63521729

**Table. S1 Operation conditions for the two reactors**

| Time<br>(d) | R1 | Influent |       |       | Aeration |       |       | Settling | Effluent |
|-------------|----|----------|-------|-------|----------|-------|-------|----------|----------|
|             | R2 | (min)    | (min) | (min) | (min)    | (min) | (min) | (min)    |          |
| 1-5         | R1 | 7        |       |       | 210      |       |       | 20       | 3        |
|             | R2 | 7        | 50    | 40    | 50       | 40    | 30    | 20       | 3        |
| 6-17        | R1 | 7        |       |       | 215      |       |       | 15       | 3        |
|             | R2 | 7        | 50    | 40    | 50       | 40    | 35    | 15       | 3        |
| 18-29       | R1 | 7        |       |       | 220      |       |       | 10       | 3        |
|             | R2 | 7        | 50    | 40    | 50       | 40    | 40    | 10       | 3        |
| 30-38       | R1 | 7        |       |       | 225      |       |       | 5        | 3        |
|             | R2 | 7        | 50    | 40    | 50       | 40    | 45    | 5        | 3        |
| 39-44       | R1 | 7        |       |       | 226      |       |       | 4        | 3        |
|             | R2 | 7        | 50    | 40    | 50       | 40    | 46    | 4        | 3        |
| 45-55       | R1 | 7        |       |       | 227      |       |       | 3        | 3        |
|             | R2 | 7        | 50    | 40    | 50       | 40    | 47    | 3        | 3        |

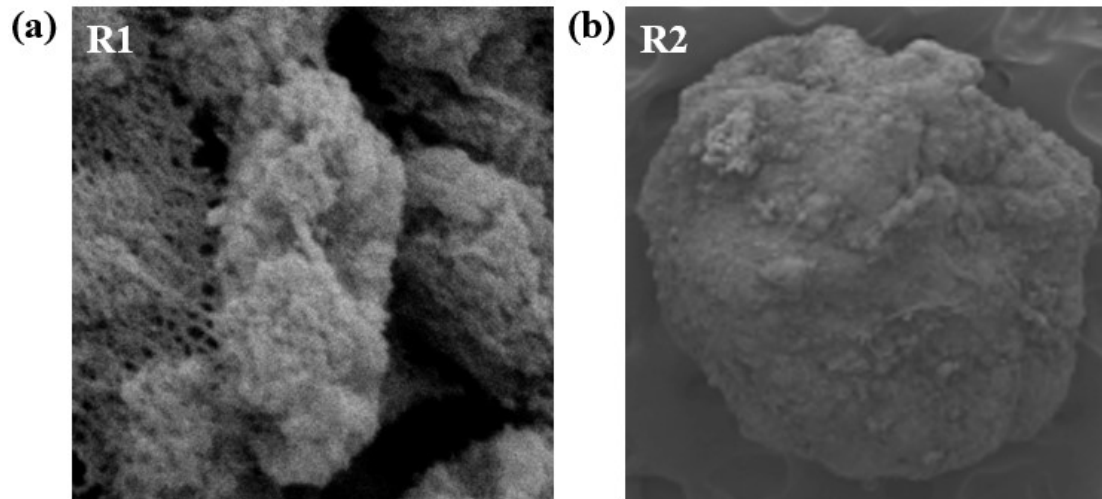

**Fig. S1 SEM images of aerobic granules in both reactors: a. R1; b. R2**
